# Supplementary material
Source: PubMed Central journal article supplement (PMC3479607)
Supplement: 1208724109_pnas.201208724SI.pdf [file 1208724109_pnas.201208724SI.pdf]

# Supporting Information

Taylor et al. 10.1073/pnas.1208724109

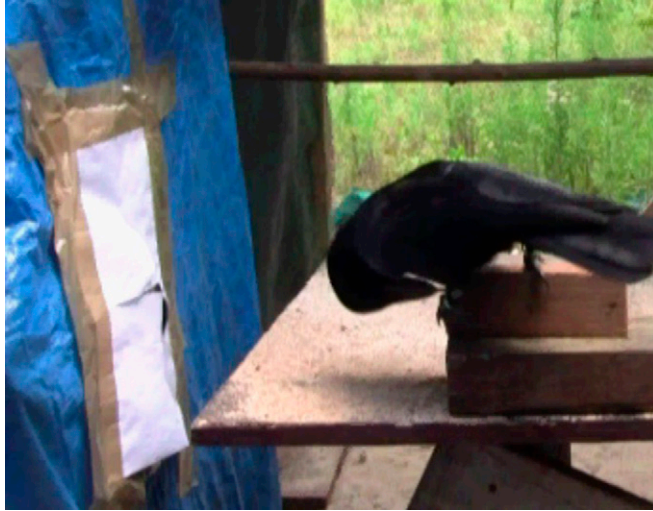

**Movie S1.** Response of New Caledonian crows to the HCA and UCA conditions. The number of inspections of the hide by the crow is noted in the upper-left corner for each condition.

[Movie S1](#)
